# Supplementary material
Source: HighWire-hosted journal article supplement (https://informatics.bmj.com/content/26/1/e100086)
Supplement: inline-supplementary-material-1 [file inline-supplementary-material-1.pdf]

## Appendix

### Diabetes Care Questionnaire (DCQ)

1. Overall for what percentage of your diabetic patients do you routinely assign the "250" ICD code in the patient's problem list in the EMR **to ensure that your patients can be identified as diabetics?**
2. Follow-up visits are routine visits that are conducted every 3-6 months after a patient is diagnosed with diabetes. For what percentage of your **stable** diabetic patients do you routinely assign the "250" ICD-9 code in the EMR for nearly all or all diabetes follow up visits to ensure that your patient can be identified as having diabetes and to ensure accurate billing or resource use?
3. For what percentage of your **unstable** diabetic patients do you routinely assign the "250" ICD-9 code in the Diabetes EMR template for nearly all or all diabetes follow up visits to ensure that your patient can be identified as having diabetes and to ensure accurate billing or resource use??
4. For what percentage of your **stable** diabetic patients:
  - a. Have you ever created a diabetes recall/reminder?
  - b. Do you order/view Hemoglobin A1C in the EMR at all or nearly all diabetes follow-up visits?
  - c. Do you record blood pressure in the EMR at all or nearly all diabetes follow-up visits?
5. For what percentage of your **stable** diabetic patients:
  - a) Have you ever created a diabetes recall/reminder?
  - b) Do you order/view Hemoglobin A1C in the EMR at all or nearly all diabetes follow-up visits?
  - c) Do you record blood pressure in the EMR at all or nearly all diabetes follow-up visits?
6. Please feel to share how you use the EMR for diabetes care management.
